# Supplementary material for: Modeling bistable cell-fate choices in theDrosophilaeye: qualitative and quantitative perspectives
Source: Oxford University Press journal article supplement (doi:10.1242/dev.044826), 2010-06-22
Supplement: dev044826tables3.pdf [file dev044826tables3.pdf]

**Table S3. Binding and unbinding rates giving bistable behavior of the Yan network model**

|                                    |                             |      |
|------------------------------------|-----------------------------|------|
| Mae-Yan association                | $\vec{k}_{M:Y}$             | 0.1  |
| Mae-Yan dissociation               | $\overleftarrow{k}_{M:Y}$   | 0.01 |
| Mae-phospho-Yan association        | $\vec{k}_{M:Y^*}$           | 0.1  |
| Mae-phospho-Yan dissociation       | $\overleftarrow{k}_{M:Y^*}$ | 10   |
| Mae-PntP2 association              | $\vec{k}_{M:P_2}$           | 0.1  |
| Mae-PntP2 dissociation             | $\overleftarrow{k}_{M:P_2}$ | 0.01 |
| <i>yan</i> mRNA-miR-7 association  | $\vec{k}_{mR7}$             | 0.1  |
| <i>yan</i> mRNA-miR-7 dissociation | $\overleftarrow{k}_{mR7}$   | 0.01 |
